# Supplementary material for: Selective and Genetic Constraints on Pneumococcal Serotype Switching
Source: PubMed Central journal article supplement (PMC4380333; doi:10.1371/journal.pgen.1005095), 2015-03-31

(A)

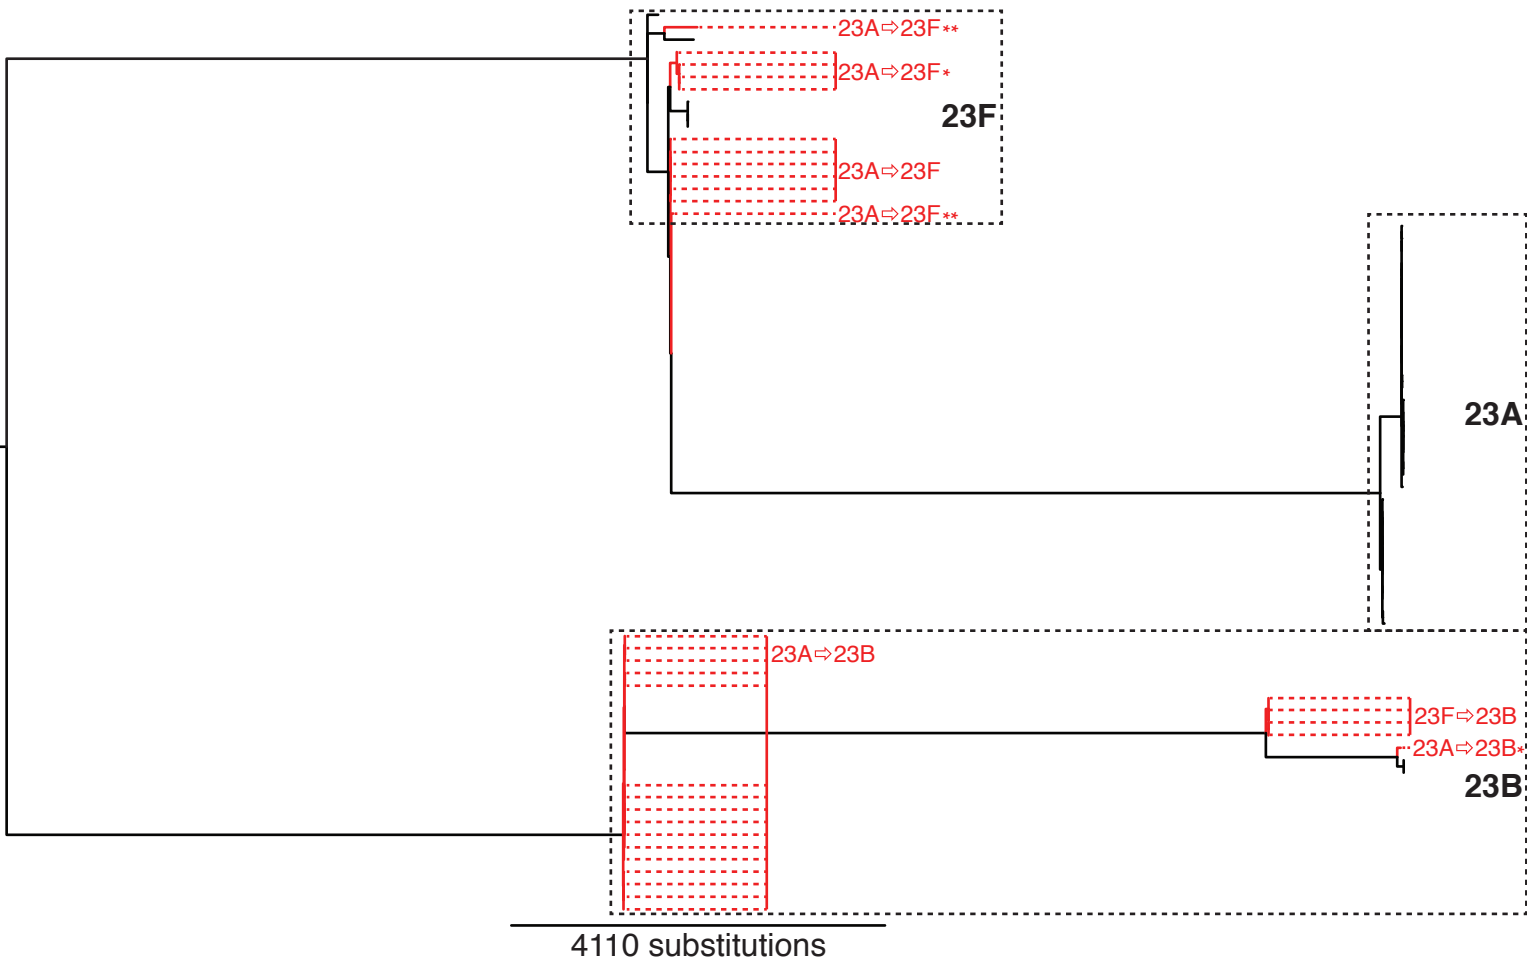

(B)

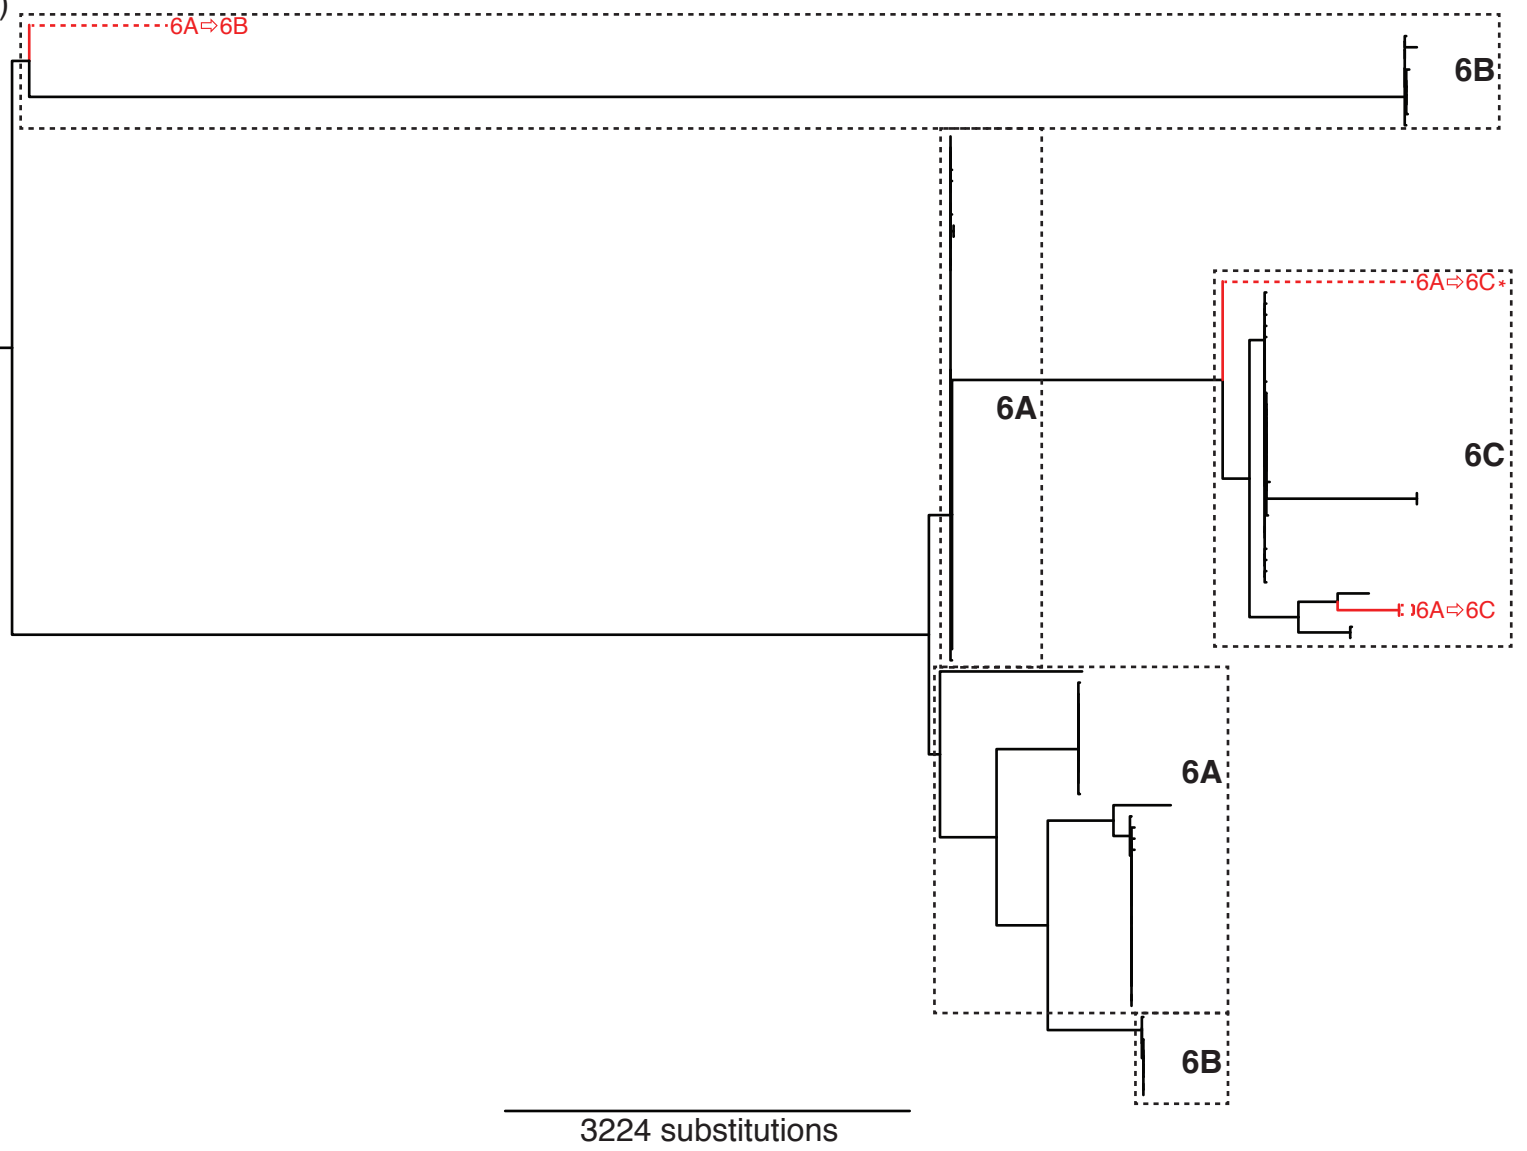

Supplement: pgen.1005095.s001.pdf [file pgen.1005095.s001.pdf]
