# Supplementary material for: Selective and Genetic Constraints on Pneumococcal Serotype Switching
Source: PubMed Central journal article supplement (PMC4380333; doi:10.1371/journal.pgen.1005095), 2015-03-31

S3 Figure

(A)

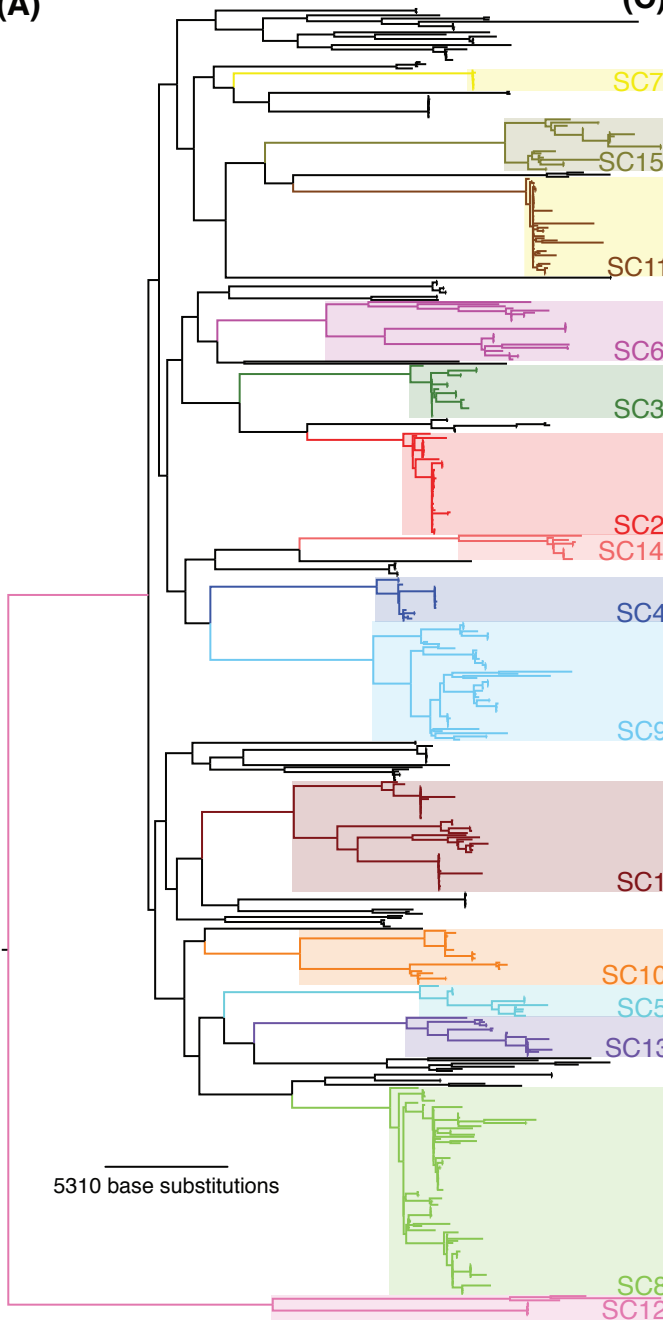

**Key**

- Present in assembly
- Absent from assembly

(B)

SP\_0061-4  
SP\_0090-2  
SP\_0248-50  
manLMN  
celBCD  
SP\_0321-5  
miaf  
SP\_0474-8  
bglp  
gatABC  
malT  
SP\_0845-8  
fruA  
lacEF-2  
ntlapp  
SP\_1617-9  
SP\_1681-3  
SP\_1684  
SP\_1688-90  
sorH  
susXT1T2  
SPN23F18210-30  
SP\_1884  
raIGFE  
SP\_2022-4  
SP\_2036-8  
malXCD  
SP\_2129-30  
SP\_2161-4  
gfp

(C)

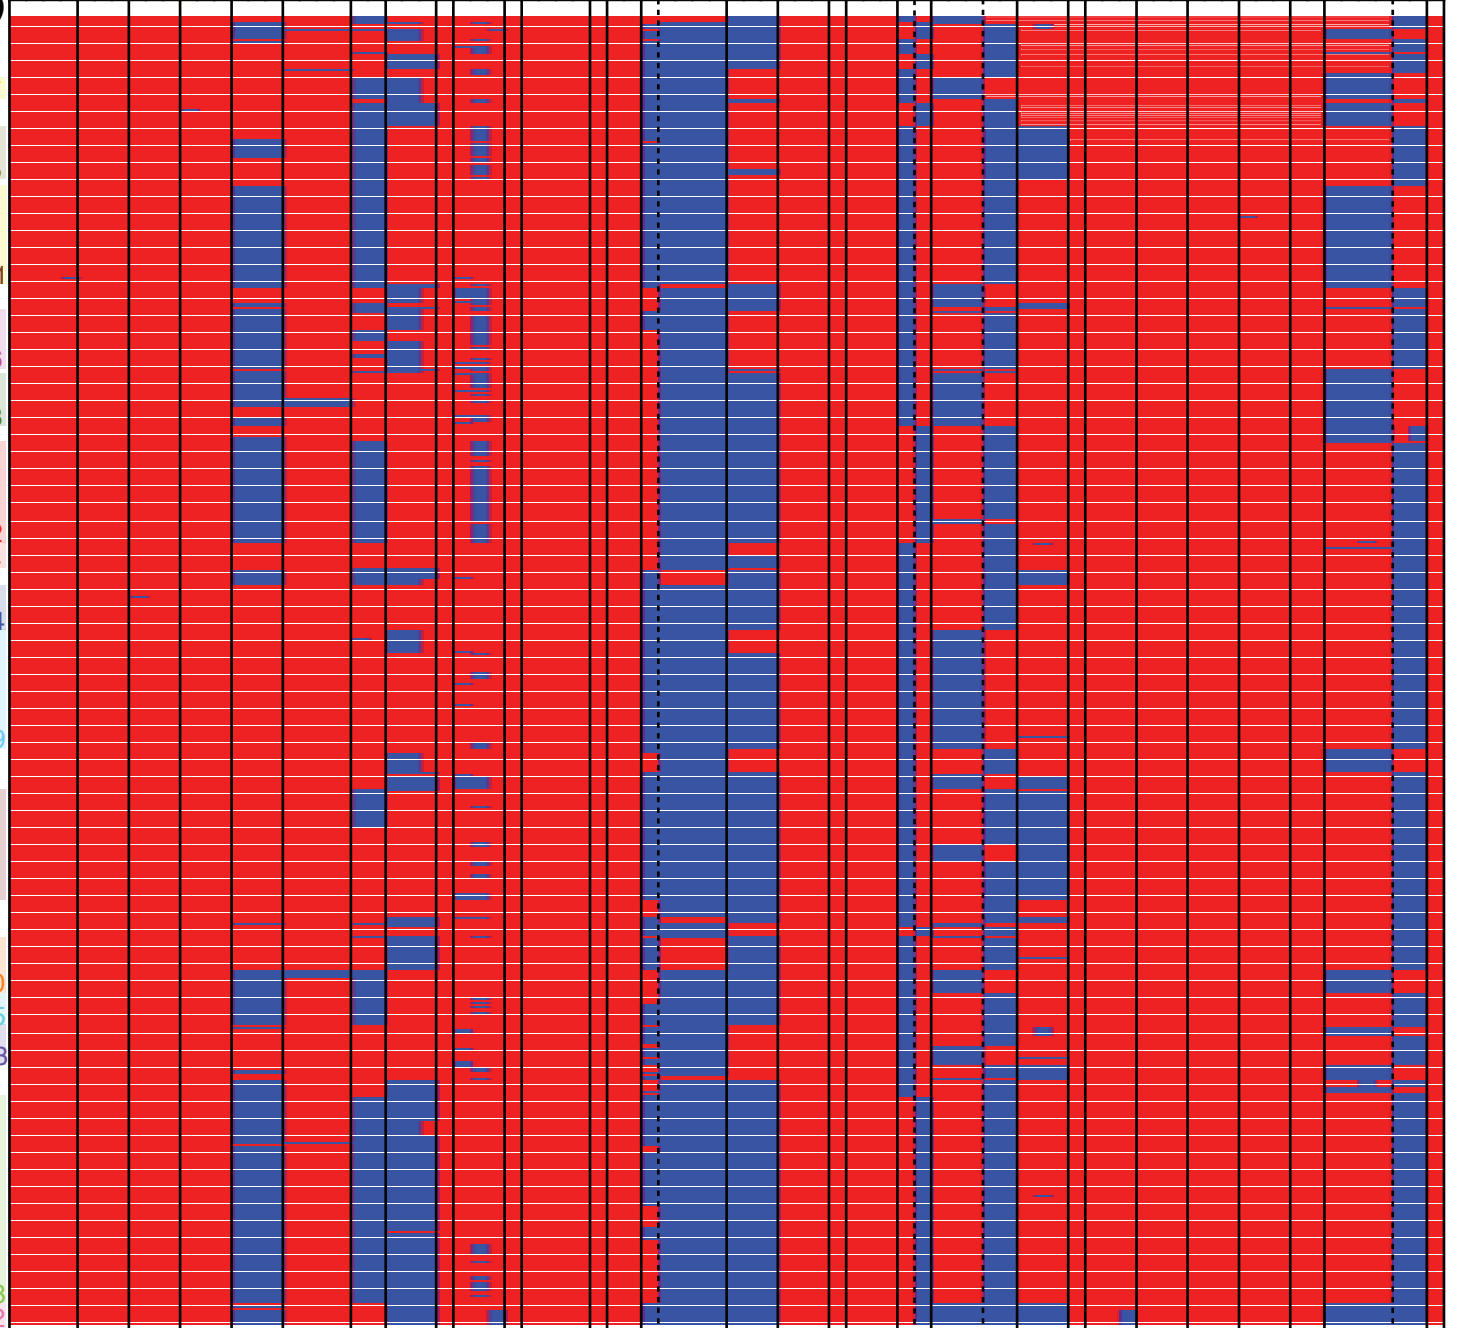

Supplement: pgen.1005095.s003.pdf [file pgen.1005095.s003.pdf]
